# Supplementary material for: Inhibitory Effect of pH-Responsive Nanogel Encapsulating Ginsenoside CK against Lung Cancer
Source: MDPI journal article supplement (doi:10.3390/polym13111784), 2021-05-28
Supplement: s1 [file s1]

# **Inhibitory Effect of pH-Responsive Nanogel Encapsulating Ginsenoside CK against Lung Cancer**

Ziyang Xue <sup>1,2,†</sup>, Rongzhan Fu <sup>1,2,†</sup>, Zhiguang Duan <sup>1,2</sup>, Lei Chi <sup>1,2</sup>, Chenhui Zhu  
<sup>1,2,\*</sup> and Daidi Fan <sup>1,2,\*</sup>

<sup>1</sup> Shaanxi Key Laboratory of Degradable Biomedical Materials and Shaanxi  
R&D Center of Biomaterials and Fermentation Engineering, School of Chemical  
Engineering, Northwest University, Taibai North Road 229, Xi'an, Shaanxi,  
710069, China

<sup>2</sup> Biotech & Biomed Research Institute, Northwest University, Taibai North  
Road 229, Xi'an, Shaanxi, 710069, China

† These authors contributed equally to this work.

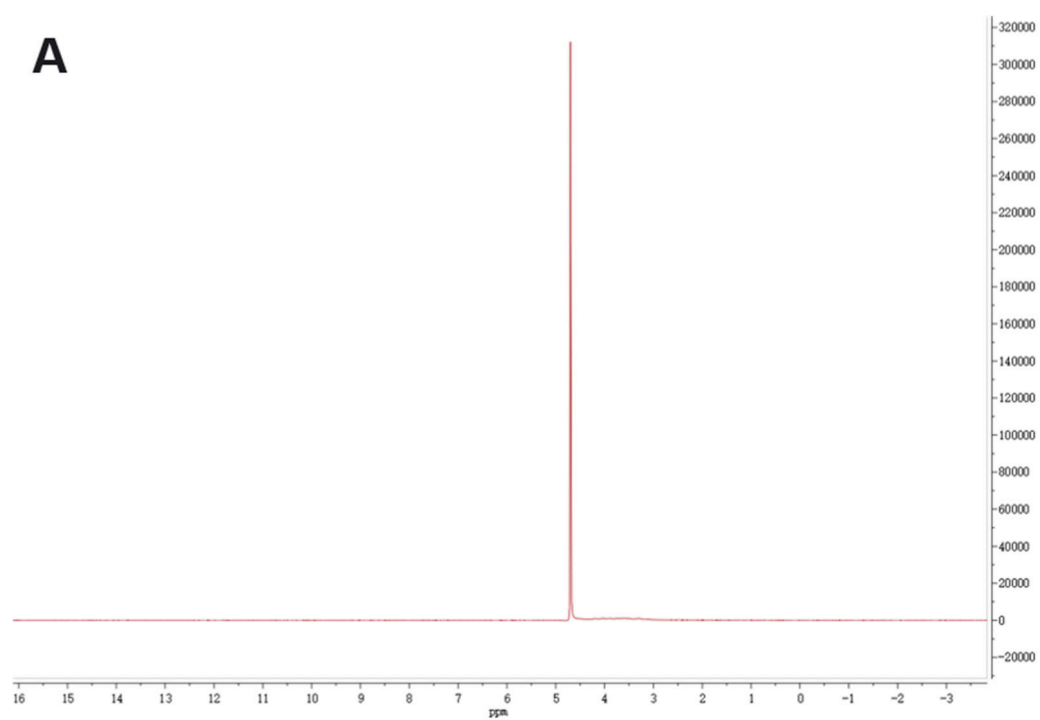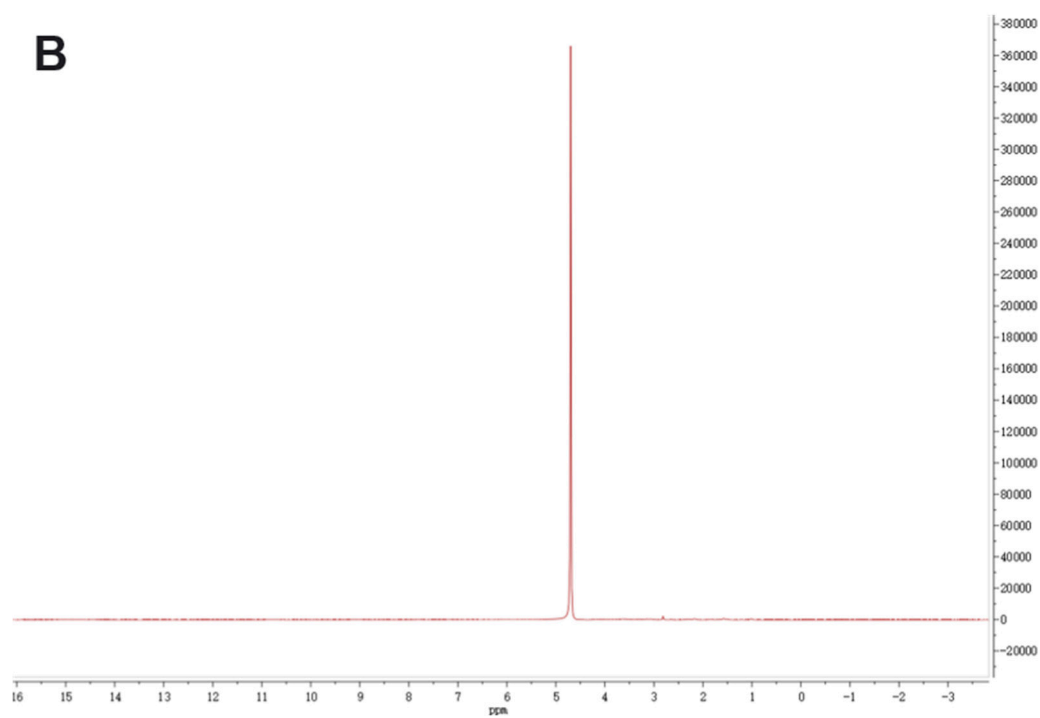

**Figure S1.**  $^1\text{H}$  NMR raw spectrum of CMC (A), and CMC-NH<sub>2</sub> (B).
